# Supplementary material for: Alteration in the Cytokine Secretion of Bone Marrow Stromal Cells from Patients with Chronic Myelomonocytic Leukemia Contribute to Impaired Hematopoietic Supportive Activity
Source: Hindawi journal article supplement (doi:10.1155/2018/5921392), 2018-07-10
Supplement: f1 [file 5921392.f1.pdf]

## Supplementary information

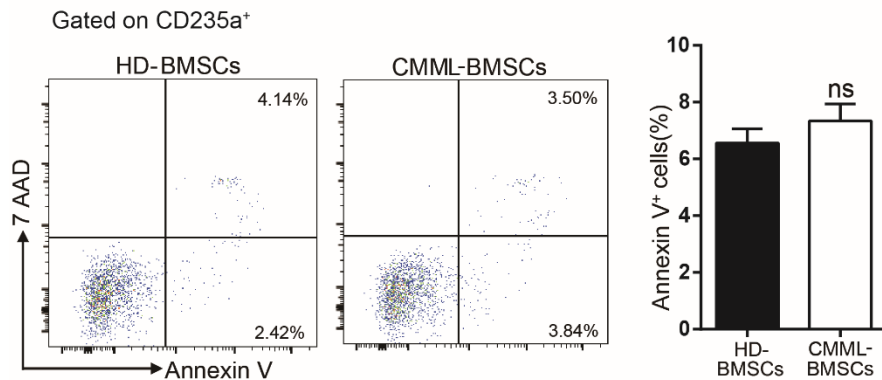

**Figure S1.**

Apoptosis analysis (Annexin V/7AAD staining) on CD235a<sup>+</sup> cells derived from CB CD34<sup>+</sup> cells after 3 days co-culture with HD-BMSCs or CMML-BMSCs. Data are presented as the mean  $\pm$  SEM (n=5), ns, not significant.

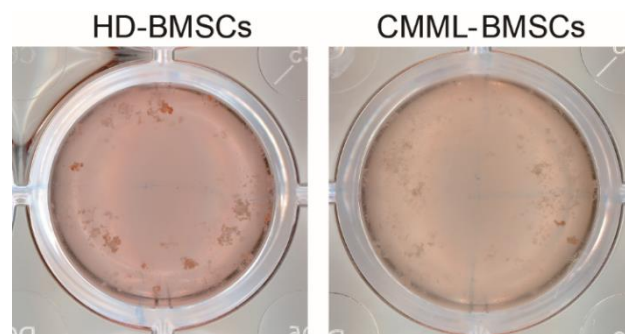

**Figure S2.**

Representative photographs of the colonies of cells after 3 days co-culture of CB CD34<sup>+</sup> cells with HD-BMSCs or CMML-BMSCs followed by 14 days culture on methylcellulose.

**Table S1. Clinical information of CMML patients**

| Patients | Gender | Diagnosis | Age at diagnosis | CPSS-P         |
|----------|--------|-----------|------------------|----------------|
| M6       | M      | CMML      | 66               | intermediate-2 |
| M73      | F      | CMML      | 57               | High           |
| M97      | M      | CMML      | 62               | intermediate-1 |
| M144     | M      | CMML      | 72               | intermediate-1 |
| M260     | M      | CMML      | 78               | High           |
| M277     | M      | CMML      | 87               | intermediate-1 |
| M288     | M      | CMML      | 81               | intermediate-2 |
| M340     | F      | CMML      | 63               | low            |
| M347     | M      | CMML      | 29               | intermediate-1 |
| M368     | M      | CMML      | 61               | intermediate-2 |
| M429     | F      | CMML      | 57               | intermediate-2 |
| M432     | M      | CMML      | 42               | intermediate-1 |
| M479     | M      | CMML      | 75               | intermediate-2 |

\* Modified CMML-specific prognostic scoring system including platelet count (CPSS-P)
